# Supplementary material
Source: PubMed Central journal article supplement (PMC8273135)
Supplement: NIHMS1706022-supplement-Major_Resources_Table.pdf [file NIHMS1706022-supplement-Major_Resources_Table.pdf]

## Major Resources Table

In order to allow validation and replication of experiments, all essential research materials listed in the Methods should be included in the Major Resources Table below. Authors are encouraged to use public repositories for protocols, data, code, and other materials and provide persistent identifiers and/or links to repositories when available. Authors may add or delete rows as needed.

### Animals (in vivo studies)

| Species             | Vendor or Source   | Background Strain | Sex | Persistent ID / URL                                                               |
|---------------------|--------------------|-------------------|-----|-----------------------------------------------------------------------------------|
| <i>Mus musculus</i> | Jackson Laboratory | C57BL/6           | M   | <a href="https://www.jax.org/strain/000664">https://www.jax.org/strain/000664</a> |
| <i>Mus musculus</i> | Jackson Laboratory | C57BL/6           | F   | <a href="https://www.jax.org/strain/000664">https://www.jax.org/strain/000664</a> |

### Genetically Modified Animals

| Name                         | Species             | Vendor or Source                              | Background Strain      | Other Information                                                                                                                                                                                                                                                   | Persistent ID / URL                                                               |
|------------------------------|---------------------|-----------------------------------------------|------------------------|---------------------------------------------------------------------------------------------------------------------------------------------------------------------------------------------------------------------------------------------------------------------|-----------------------------------------------------------------------------------|
| <i>Ren1<sup>c-YFP</sup></i>  | <i>Mus musculus</i> | Maria Luisa S. Sequeira-Lopez, R. Ariel Gomez | C57BL/6                | Pentz ES, Lopez ML, Cordaillat M, Gomez RA. Identity of the renin cell is mediated by cAMP and chromatin remodeling: an in vitro model for studying cell recruitment and plasticity. <i>Am J Physiol Heart Circ Physiol.</i> 2008;294:H699-H707. [PubMed: 18055510] |                                                                                   |
| <i>Ren1<sup>dCre</sup></i>   | <i>Mus musculus</i> | Maria Luisa S. Sequeira-Lopez, R. Ariel Gomez | C57BL/6                | Sequeira López ML, Pentz ES, Nomasa T, Smithies O, Gomez RA. Renin cells are precursors for multiple cell types that switch to the renin phenotype when homeostasis is threatened. <i>Dev Cell.</i> 2004;6:719-728. [PubMed: 15130496]                              |                                                                                   |
| <i>Itgb1<sup>fllox</sup></i> | <i>Mus musculus</i> | Jackson Laboratory                            | B6;129                 |                                                                                                                                                                                                                                                                     | <a href="https://www.jax.org/strain/004605">https://www.jax.org/strain/004605</a> |
| <i>Lmna<sup>fllox</sup></i>  | <i>Mus musculus</i> | Dr. Yixian Zheng                              | CD1; 129; Sv; C57Bl/6J | Kim Y, Zheng Y. Generation and characterization of a conditional deletion allele for Lmna in mice. <i>Biochem Biophys Res Commun.</i> 2013;44:8-13. [PubMed: 23998933]                                                                                              | <a href="https://www.jax.org/strain/026284">https://www.jax.org/strain/026284</a> |

### Antibodies

| Target antigen     | Vendor or Source                              | Catalog #   | Working concentration | Persistent ID / URL                                                                                                                         |
|--------------------|-----------------------------------------------|-------------|-----------------------|---------------------------------------------------------------------------------------------------------------------------------------------|
| Digoxigenin        | Millipore-Sigma                               | 11093274910 | 1:4,000               | <a href="https://www.sigmaaldrich.com/catalog/product/roche/11093274910">https://www.sigmaaldrich.com/catalog/product/roche/11093274910</a> |
| Renin              | Maria Luisa S. Sequeira-Lopez, R. Ariel Gomez |             | 1:500                 |                                                                                                                                             |
| $\alpha$ -SMA      | Millipore-Sigma                               | A2547       | 1:10,000              | <a href="https://www.sigmaaldrich.com/catalog/product/sigma/a2547">https://www.sigmaaldrich.com/catalog/product/sigma/a2547</a>             |
| Integrin $\beta$ 1 | Douglas W. DeSimone                           |             | 1:250                 |                                                                                                                                             |

|                     |                           |             |          |                                                                                                                                                                                                                                                                                       |
|---------------------|---------------------------|-------------|----------|---------------------------------------------------------------------------------------------------------------------------------------------------------------------------------------------------------------------------------------------------------------------------------------|
| Integrin $\alpha 5$ | Douglas W. DeSimone       |             | 1:1,000  |                                                                                                                                                                                                                                                                                       |
| Integrin $\alpha V$ | Cell Signaling Technology | 60896       | 1:1,000  | <a href="https://www.cellsignal.com/products/primary-antibodies/integrin-av-d2n5h-rabbit-mab/60896">https://www.cellsignal.com/products/primary-antibodies/integrin-av-d2n5h-rabbit-mab/60896</a>                                                                                     |
| lamin A + lamin C   | Abcam                     | ab133256    | 1:400    | <a href="https://www.abcam.com/lamin-a--lamin-c-antibody-ep4520-16-ab133256.html">https://www.abcam.com/lamin-a--lamin-c-antibody-ep4520-16-ab133256.html</a>                                                                                                                         |
| Renin               | Dr. Tadashi Inagami       |             | 1:200    |                                                                                                                                                                                                                                                                                       |
| H3K4me1             | Thermo Fisher Scientific  | 710795      | 1:1,000  | <a href="https://www.thermofisher.com/antibody/product/H3K4me1-Antibody-Recombinant-Polyclonal/710795">https://www.thermofisher.com/antibody/product/H3K4me1-Antibody-Recombinant-Polyclonal/710795</a>                                                                               |
| H3K4me2             | Abcam                     | ab7766      | 1:1,000  | <a href="https://www.abcam.com/histone-h3-di-methyl-k4-antibody-chip-grade-ab7766.html">https://www.abcam.com/histone-h3-di-methyl-k4-antibody-chip-grade-ab7766.html</a>                                                                                                             |
| H3K4me3             | Active Motif              | 39060       | 1:1,000  | <a href="https://www.activemotif.com/catalog/details/39159">https://www.activemotif.com/catalog/details/39159</a>                                                                                                                                                                     |
| H3K9me2             | Abcam                     | ab1220      | 1:1,000  | <a href="https://www.abcam.com/histone-h3-di-methyl-k9-antibody-mabcam-1220-chip-grade-ab1220.html">https://www.abcam.com/histone-h3-di-methyl-k9-antibody-mabcam-1220-chip-grade-ab1220.html</a>                                                                                     |
| H3K9me3             | Active Motif              | 39162       | 1:1,000  | <a href="https://www.activemotif.com/catalog/details/39161">https://www.activemotif.com/catalog/details/39161</a>                                                                                                                                                                     |
| H3K27ac             | Abcam                     | ab4729      | 1:2,000  | <a href="https://www.abcam.com/histone-h3-acetyl-k27-antibody-chip-grade-ab4729.html">https://www.abcam.com/histone-h3-acetyl-k27-antibody-chip-grade-ab4729.html</a>                                                                                                                 |
| H3K27me3            | Cell Signaling Technology | 9733        | 1:1,600  | <a href="https://www.cellsignal.com/products/primary-antibodies/tri-methyl-histone-h3-lys27-c36b11-rabbit-mab/9733">https://www.cellsignal.com/products/primary-antibodies/tri-methyl-histone-h3-lys27-c36b11-rabbit-mab/9733</a>                                                     |
| Lamin A/C           | Active Motif              | 39288       | 1:1,000  | <a href="https://www.activemotif.com/catalog/details/39287/lamin-a-c-antibody-mab-clone-3a6-4c11">https://www.activemotif.com/catalog/details/39287/lamin-a-c-antibody-mab-clone-3a6-4c11</a>                                                                                         |
| Rabbit IgG          | Vector Laboratories       | BA-1000     | 1:200    | <a href="https://vectorlabs.com/biotinylated-goat-anti-rabbit-igg-antibody.html">https://vectorlabs.com/biotinylated-goat-anti-rabbit-igg-antibody.html</a>                                                                                                                           |
| Mouse IgG           | Vector Laboratories       | BA-2000     | 1:200    | <a href="https://vectorlabs.com/biotinylated-horse-anti-mouse-igg-antibody.html">https://vectorlabs.com/biotinylated-horse-anti-mouse-igg-antibody.html</a>                                                                                                                           |
| Goat IgG            | Thermo Fisher Scientific  | A11055      | 1:500    | <a href="https://www.thermofisher.com/antibody/product/Donkey-anti-Goat-IgG-H-L-Cross-Adsorbed-Secondary-Antibody-Polyclonal/A-11055">https://www.thermofisher.com/antibody/product/Donkey-anti-Goat-IgG-H-L-Cross-Adsorbed-Secondary-Antibody-Polyclonal/A-11055</a>                 |
| Rabbit IgG          | Thermo Fisher Scientific  | A10042      | 1:500    | <a href="https://www.thermofisher.com/antibody/product/Donkey-anti-Rabbit-IgG-H-L-Highly-Cross-Adsorbed-Secondary-Antibody-Polyclonal/A10042">https://www.thermofisher.com/antibody/product/Donkey-anti-Rabbit-IgG-H-L-Highly-Cross-Adsorbed-Secondary-Antibody-Polyclonal/A10042</a> |
| Mouse IgG           | Thermo Fisher Scientific  | A10037      | 1:500    | <a href="https://www.thermofisher.com/antibody/product/Donkey-anti-Mouse-IgG-H-L-Highly-Cross-Adsorbed-Secondary-Antibody-Polyclonal/A10037">https://www.thermofisher.com/antibody/product/Donkey-anti-Mouse-IgG-H-L-Highly-Cross-Adsorbed-Secondary-Antibody-Polyclonal/A10037</a>   |
| Rabbit IgG          | Jackson ImmunoResearch    | 711-655-152 | 1:20,000 | <a href="https://www.jacksonimmuno.com/catalog/products/711-655-152">https://www.jacksonimmuno.com/catalog/products/711-655-152</a>                                                                                                                                                   |

#### DNA/cDNA Clones

| Clone Name | Sequence | Source / Repository | Persistent ID / URL |
|------------|----------|---------------------|---------------------|
| n/a        |          |                     |                     |

## Cultured Cells

| Name                                 | Vendor or Source                                    | Sex (F, M, or unknown) | Persistent ID / URL                                                                                                                                                                                                                                                                      |
|--------------------------------------|-----------------------------------------------------|------------------------|------------------------------------------------------------------------------------------------------------------------------------------------------------------------------------------------------------------------------------------------------------------------------------------|
| CFP/YFP cells<br>(10 to 20 passages) | Maria Luisa S.<br>Sequeira-Lopez,<br>R. Ariel Gomez | F                      | Pentz ES, Lopez ML, Cordaillat M,<br>Gomez RA. Identity of the renin cell is<br>mediated by cAMP and chromatin<br>remodeling: an in vitro model for<br>studying cell recruitment and plasticity.<br><i>Am J Physiol Heart Circ Physiol.</i><br>2008;294:H699-H707.<br>[PubMed: 18055510] |

## Data & Code Availability

| Description | Source / Repository | Persistent ID / URL |
|-------------|---------------------|---------------------|
| RNA-seq     | GEO                 | GSE157699           |
| ATAC-seq    | GEO                 | GSE167522           |

## Other

| Description                                            | Source / Repository            | Persistent ID / URL  |
|--------------------------------------------------------|--------------------------------|----------------------|
| Intramedic PE Tubing                                   | Becton Dickinson               | Catalog #: 427401    |
| Acti-Stain 488 Phalloidin                              | Cytoskeleton Inc               | Catalog #: PHDG1     |
| RNAScope Probe- Mm-Kiss1                               | Advanced Cell<br>Diagnostics   | Catalog #: 500141    |
| RNAScope Probe- Mm-Vtn                                 | Advanced Cell<br>Diagnostics   | Catalog #: 443601    |
| RNAScope Probe- Mm-Sdf211                              | Advanced Cell<br>Diagnostics   | Catalog #: 562401    |
| RNAScope Probe- Mm-E2f3                                | Advanced Cell<br>Diagnostics   | Catalog #: 437821    |
| RNAScope Probe-Mm-Lmna                                 | Advanced Cell<br>Diagnostics   | Catalog #: 314811    |
| RNAScope Probe Mm-Ren1-C2                              | Advanced Cell<br>Diagnostics   | Catalog #: 433461-C2 |
| Mouse Renin 1 ELISA Kit                                | RayBiotech                     | Code: ELM-Renin1-1   |
| SMART-Seq v4 Ultra Low Input RNA Kit<br>for Sequencing | Takara Bio USA                 | Catalog #: 634888    |
| Alt-R S.p. HiFi Cas9 Nuclease V3                       | Integrated DNA<br>Technologies | Catalog #: 1081060   |
| SE Cell Line 4D-Nucleofector™ X Kit                    | Lonza                          | Catalog #: V4XC-1024 |
